# Supplementary material for: Cyclodextrins Initiated Ring-Opening Polymerization of Lactide Using 4-Dimethylaminopyridine (DMAP) as Catalyst: Study of DMAP/β-CD Inclusion Complex and Access to New Structures
Source: MDPI journal article supplement (doi:10.3390/molecules27031083), 2022-02-06
Supplement: s1 [file s1]

# Cyclodextrins initiated ring-opening polymerization of lactide using 4-dimethylaminopyridine (DMAP) as catalyst: study of DMAP/ $\beta$ -CD inclusion complex and access to new structures

Julie Meimoun <sup>1</sup>, Yupin Phuphuak <sup>1,2</sup>, Remi Miyamachi <sup>1</sup>, Yong Miao <sup>1</sup>, Marc Bria <sup>3</sup>, Cyril Rousseau <sup>4</sup>,  
Guilherme Nogueira <sup>1,5</sup>, Andreia Valente <sup>5</sup>, Audrey Favrelle-Huret <sup>1,\*</sup> and Philippe Zinck <sup>1,\*</sup>

<sup>1</sup> Univ. Lille, CNRS, Centrale Lille, Univ. Artois, UMR 8181—UCCS—Unité de Catalyse et Chimie du Solide, F-59000 Lille, France; julie.meimoun90@gmail.com (J.M.); yupinp@nu.ac.th (Y.P.); cherry.milky.853@gmail.com (R.M.); Yong.Miao@gnubiotics.com (Y.M.); guilherme.nogueira91@gmail.com (G.N.)

<sup>2</sup> Department of Chemistry, Faculty of Science, Naresuan University, Phitsanulok 65000, Thailand

<sup>3</sup> Univ. Lille, CNRS, INRA, Centrale Lille, ENSCL, Univ. Artois, FR 2638—IMEC—Institut Michel-Eugène Chevreul, Pôle RMN, F-59000 Lille, France; marc.bria@univ-lille.fr

<sup>4</sup> Univ. Artois, CNRS, Centrale Lille, ENSCL, Univ. Lille, UMR 8181—UCCS—Unité de Catalyse et Chimie du Solide, F-62300 Lens, France; cyril.rousseau@univ-artois.fr

<sup>5</sup> Centro de Química Estrutural, Institute of Molecular Sciences and Departamento de Química e Bioquímica, Faculdade de Ciências, Universidade de Lisboa, Campo Grande, 1749-016 Lisboa, Portugal; amvalente@fc.ul.pt

\* Correspondence: audrey.huret@univ-lille.fr (A.F.-H.); philippe.zinck@univ-lille.fr (P.Z.)

## Nuclear Magnetic Resonance (NMR) analysis

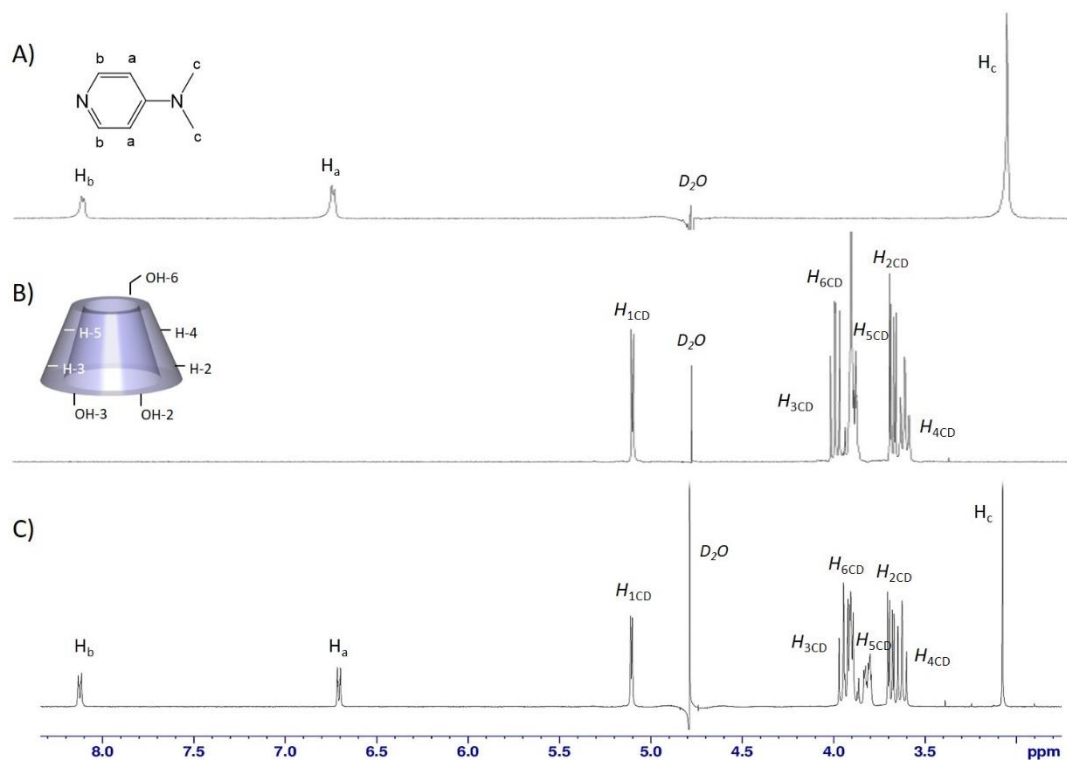

Figure S1. Superposition of  $^1\text{H}$  NMR spectra of free DMAP (A), free  $\beta$ -CD (B) and a mixture (1:1) DMAP/ $\beta$ -CD (C) in  $\text{D}_2\text{O}$  (3.7 mM, 400 MHz, 300 K)

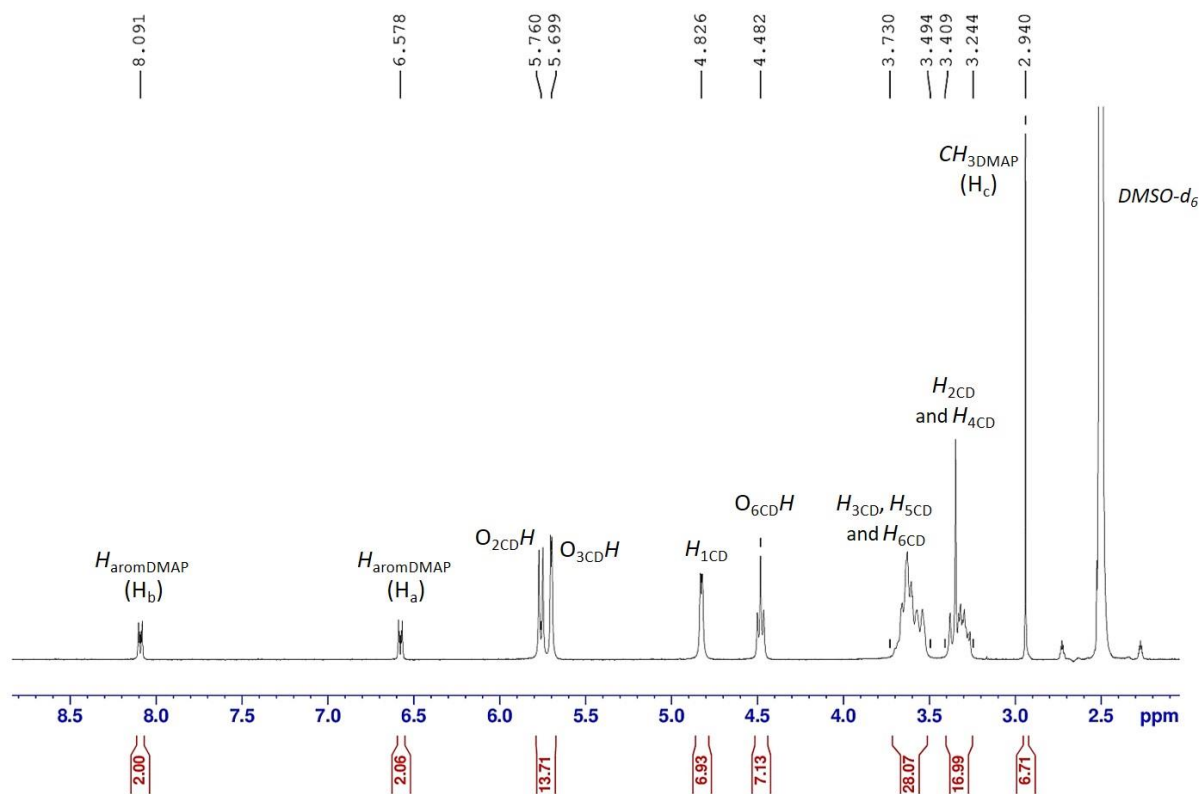

Figure S2. <sup>1</sup>H NMR spectrum of DMAP/β-CD inclusion complex in DMSO-*d*<sub>6</sub> (300 MHz, 298 K)

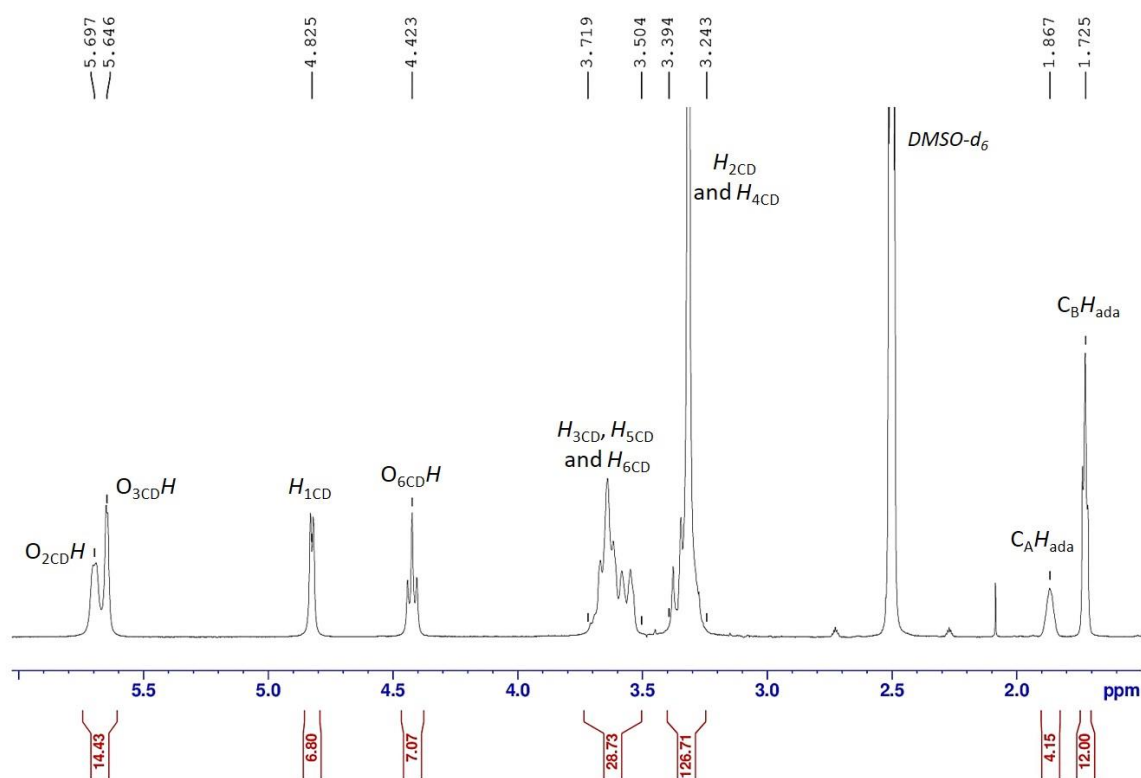

Figure S3. <sup>1</sup>H NMR spectrum of Adamantane/β-CD inclusion complex in DMSO-*d*<sub>6</sub> (300 MHz, 298 K)

## Size Exclusion Chromatography (SEC) analysis

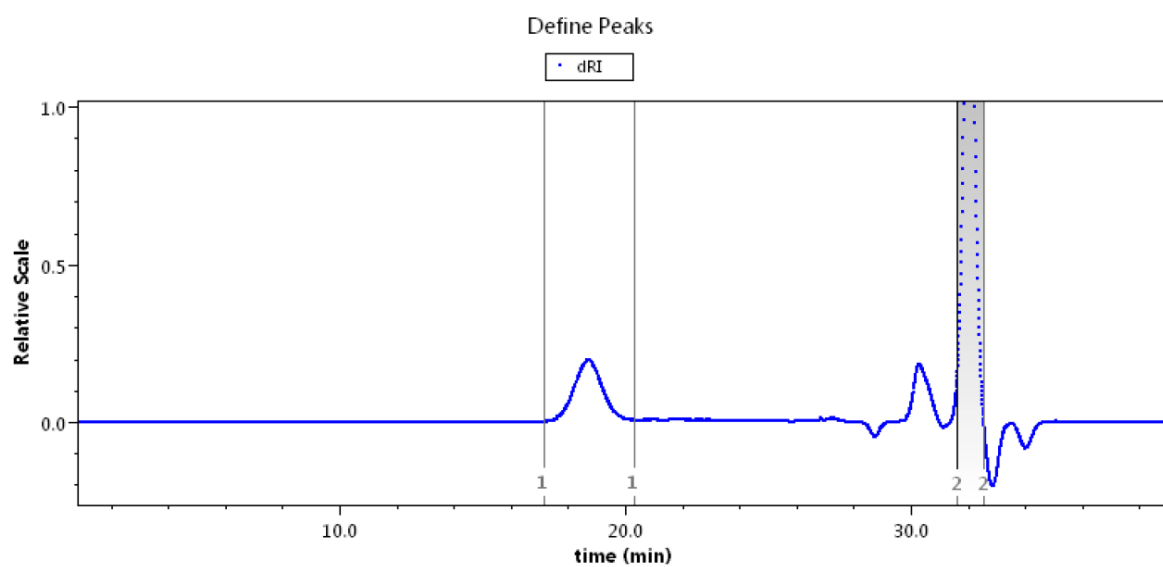

Figure S4. SEC chromatogram (THF, 40°C, polystyrene standards) of entry 2

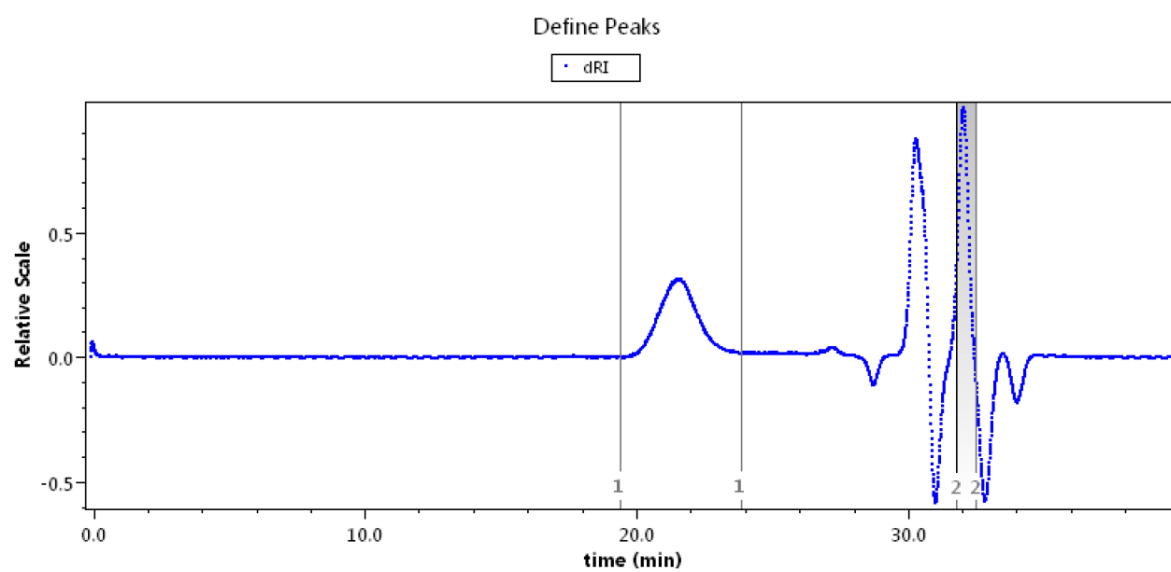

Figure S5. SEC chromatogram (THF, 40°C, polystyrene standards) of entry 4

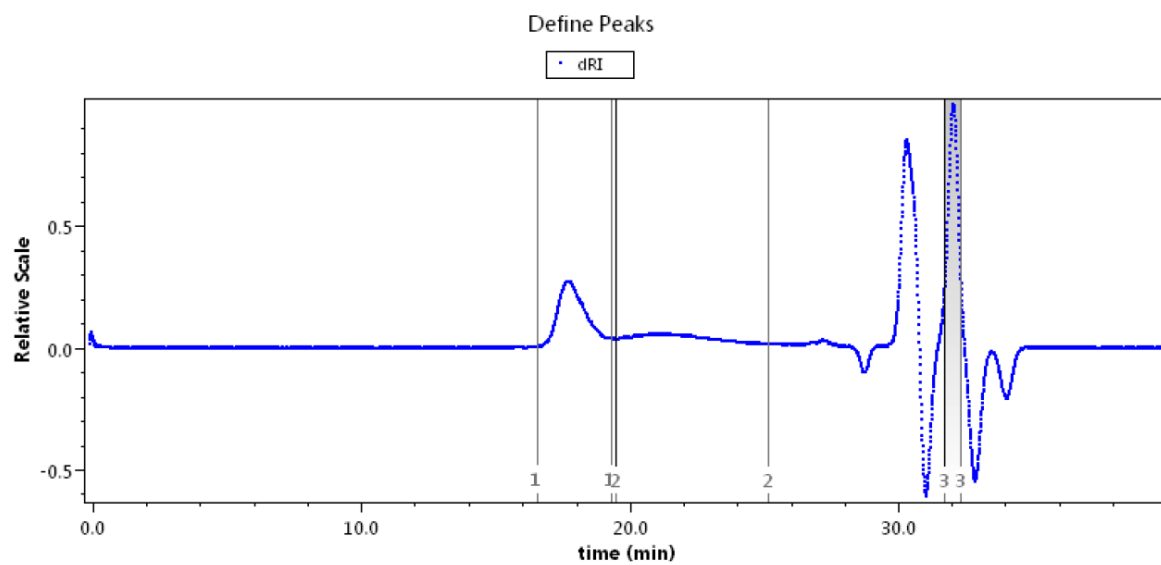

Figure S6. SEC chromatogram (THF, 40°C, polystyrene standards) of entry 5

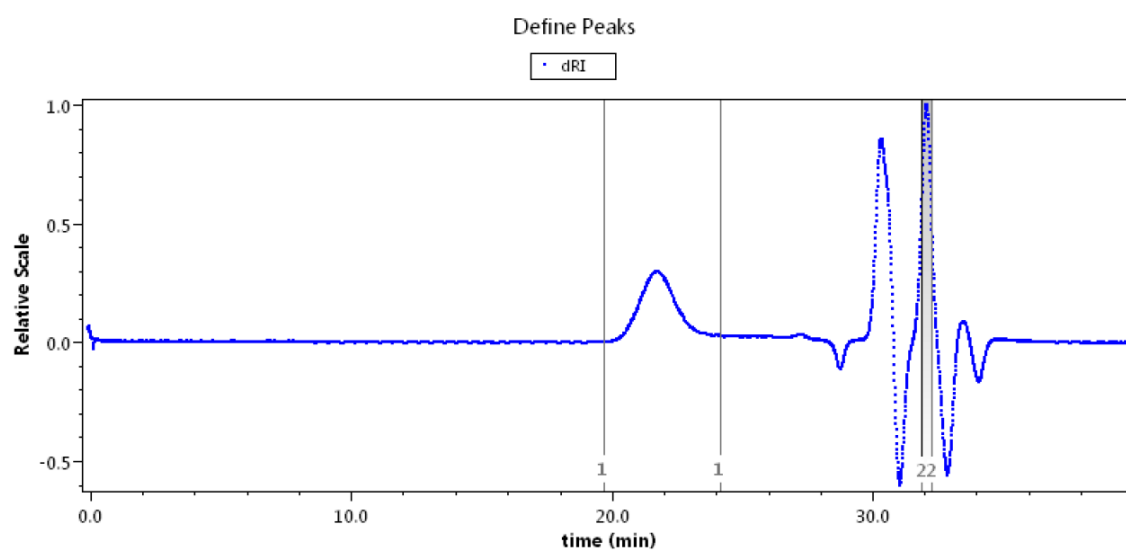

Figure S7. SEC chromatogram (THF, 40°C, polystyrene standards) of entry 6

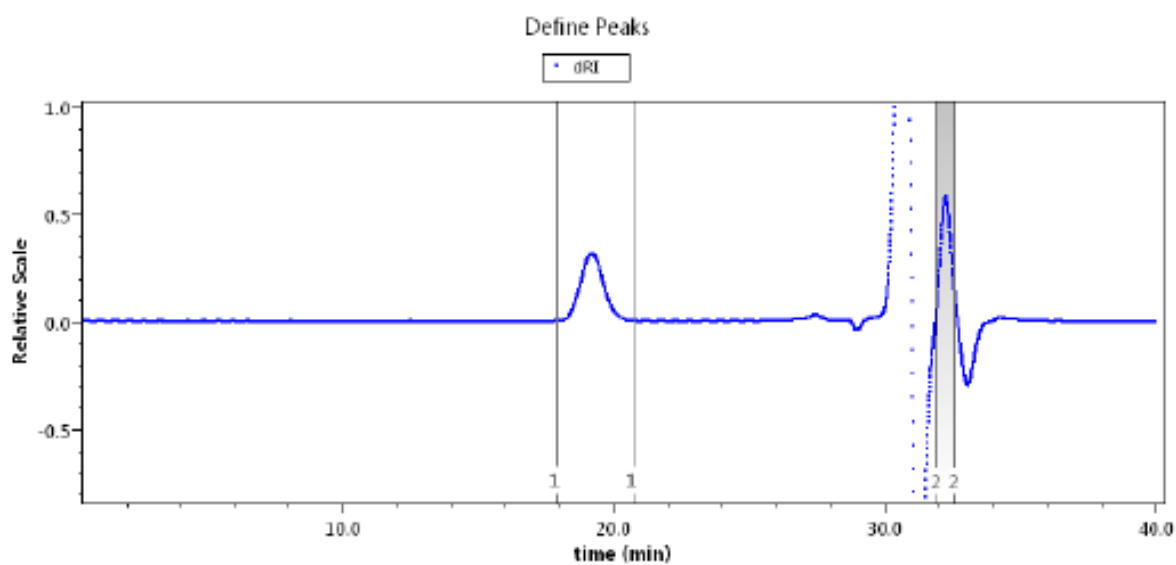

Figure S8. SEC chromatogram (THF, 40°C, polystyrene standards) of entry 7

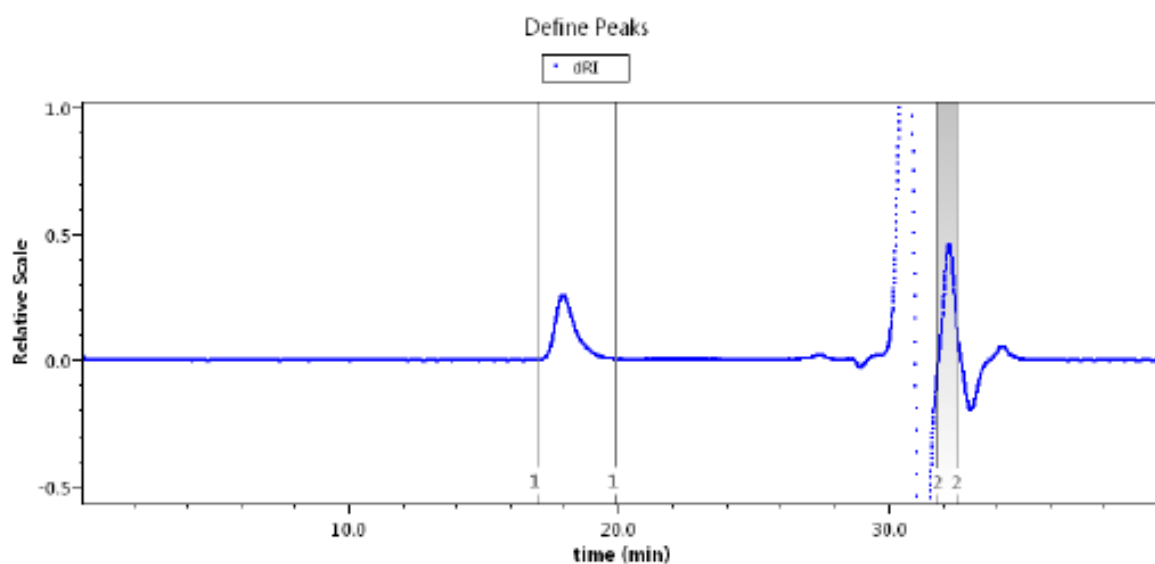

Figure S9. SEC chromatogram (THF, 40°C, polystyrene standards) of entry 8

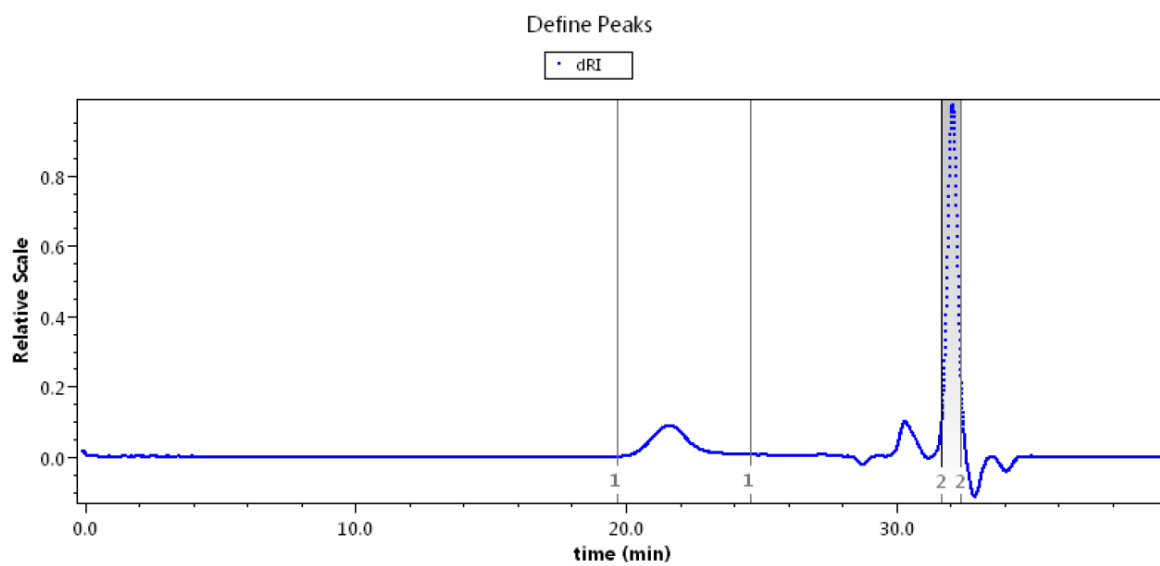

Figure S10. SEC chromatogram (THF, 40°C, polystyrene standards) of entry 9

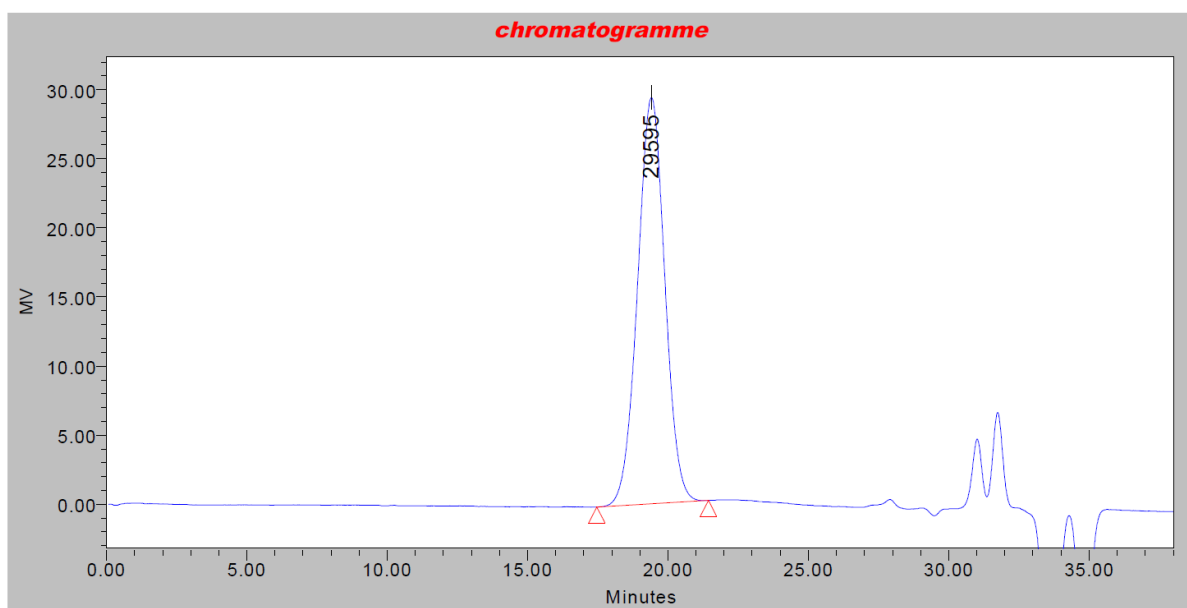

Figure S11. SEC chromatogram (THF, 40°C, polystyrene standards) of entry 10

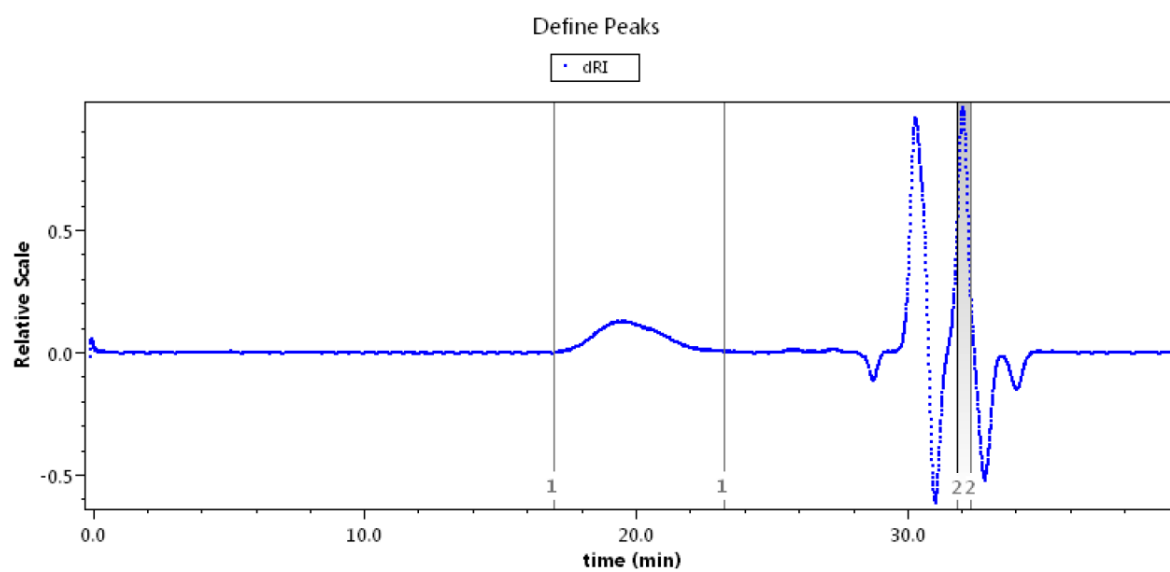

Figure S12. SEC chromatogram (THF, 40°C, polystyrene standards) of entry 11

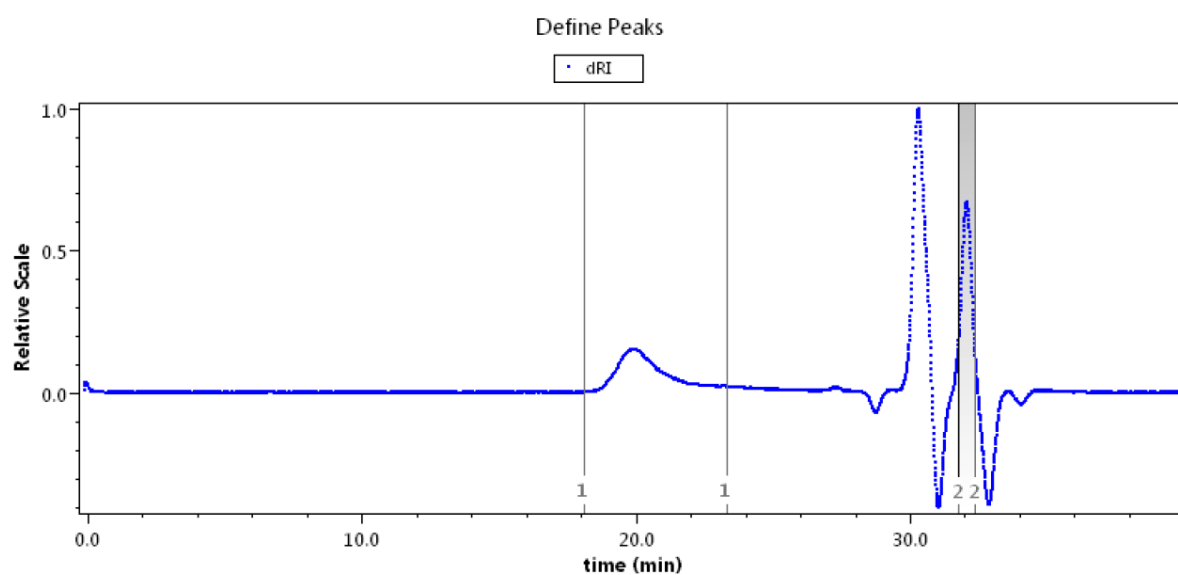

Figure S13. SEC chromatogram (THF, 40°C, polystyrene standards) of entry 12



<sup>1</sup>H in CDCl<sub>3</sub>  
 RM 40  
 Q2 = 638 Hz  
 sonde TBI temp 300K

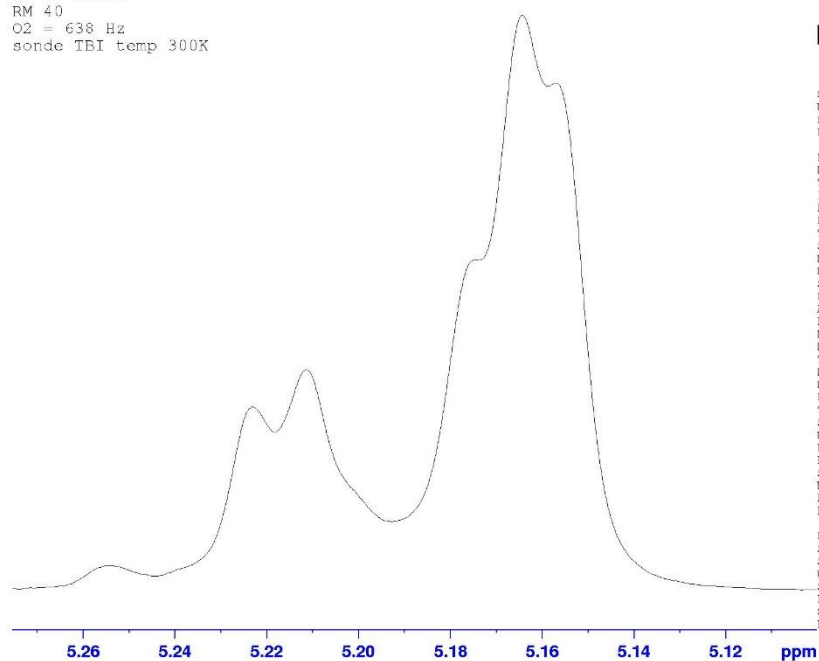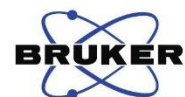

Current Data Parameters  
 NAME MS-0M-20222601  
 EXPNO 112  
 PROCNO 1

F2 - Acquisition Parameters  
 Date\_ 20220126  
 Time 10.38 h  
 INSTRUM AvanceNeo  
 PROBHD Z8277\_0032 (P)  
 PULPROG zgpg30  
 TD 65536  
 SOLVENT CDCl<sub>3</sub>  
 NS 8  
 DS 2  
 SWH 3703.704 Hz  
 FIDRES 0.113028 Hz  
 AQ 0.8473597 sec  
 RG 101  
 DW 135.000 usec  
 DE 10.51 usec  
 TE 300.0 K  
 D1 1.0000000 sec  
 D12 0.0000200 sec  
 HODDUTY 20.2 %  
 TDC 1  
 SFO1 400.3315748 MHz  
 NUC1 1H  
 FI 10.00 usec  
 PLW1 10.7729976 W  
 SFO2 400.3306380 MHz  
 NUC2 1H  
 PLW2 10.7729976 W  
 PLW24 0.00068949 W

F2 - Processing parameters  
 SI 65536  
 SF 400.3300101 MHz  
 WDW EM  
 SSB 0  
 LB 0.30 Hz  
 GB 0  
 PC 1.00

Figure S14. <sup>1</sup>H Homonuclear decoupled NMR of Entry 2

<sup>1</sup>H in CDCl<sub>3</sub>  
 AF 41C  
 O2 = 638 Hz  
 sonde TBI temp 300K

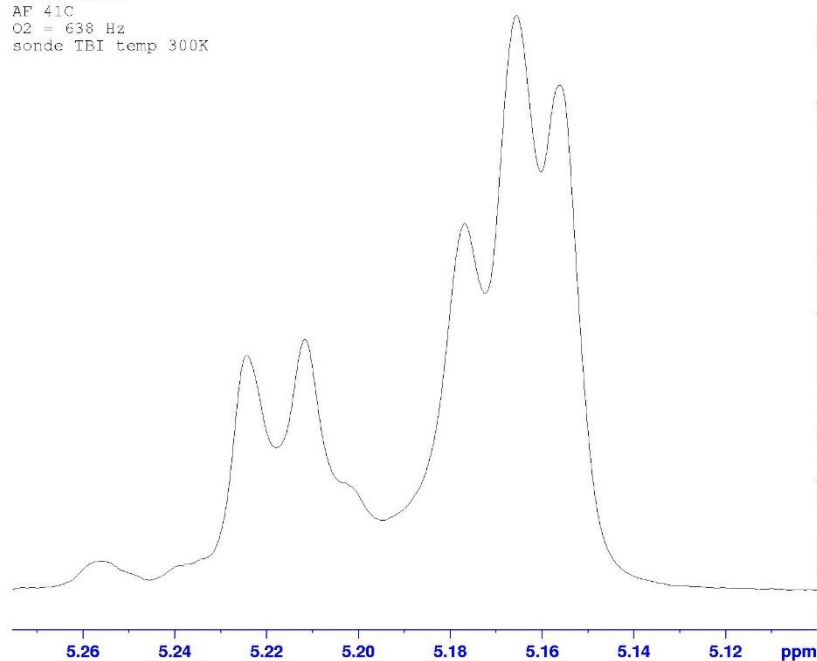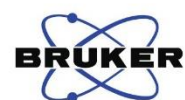

Current Data Parameters  
 NAME MS-GM-20222601  
 EXPNO 111  
 PROCNO 1

F2 - Acquisition Parameters  
 Date\_ 20220126  
 Time 10.28 h  
 INSTRUM AvanceNeo  
 PROBHD Z8277\_0032 (PE  
 PULPROG zgpg30  
 TD 65536  
 SOLVENT CDCl<sub>3</sub>  
 NS 8  
 DS 2  
 SWH 3703.704 Hz  
 FIDRES 0.113028 Hz  
 AQ 0.8473597 sec  
 RG 101  
 DW 135.000 usec  
 DE 10.51 usec  
 TE 300.2 K  
 D1 1.0000000 sec  
 D12 0.0000200 sec  
 HODDUTY 20.2 %  
 TDC 1  
 SFO1 400.3315748 MHz  
 NUC1 1H  
 F1 10.00 usec  
 PLW1 10.7729976 W  
 SFO2 400.3306380 MHz  
 NUC2 1H  
 PLW2 10.7729976 W  
 PLW24 0.00068949 W

F2 - Processing parameters  
 SI 65536  
 SF 400.3300103 MHz  
 WDW EM  
 SSB 0  
 LB 0.30 Hz  
 GB 0  
 PC 1.00

Figure S15. <sup>1</sup>H Homonuclear decoupled NMR of Entry 5

<sup>1</sup>H in CDCl<sub>3</sub>  
 AF 004 - C (9)  
 Q2 = 638 Hz  
 sonde TBI temp 300K

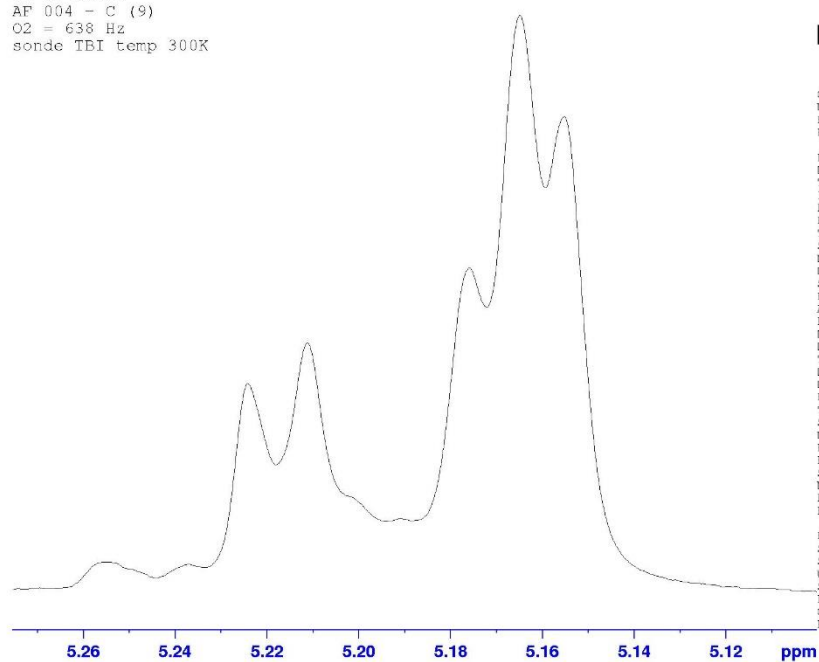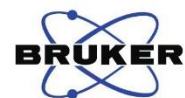

Current Data Parameters  
 NAME MB-JM-20222601  
 EXPNO 121  
 PROCNO 1

F2 - Acquisition Parameters  
 Date\_ 20220126  
 Time 11.28 h  
 INSTRUM AvanceNeo  
 PROBHD Z8277\_0032 (PE  
 PULPROG zgpg30  
 TD 65536  
 SOLVENT CDCl<sub>3</sub>  
 NS 8  
 DS 2  
 SWH 3703.704 Hz  
 FIDRES 0.113028 Hz  
 AQ 8.8473597 sec  
 RG 101  
 DW 135.000 usec  
 DE 10.51 usec  
 TE 300.0 K  
 D1 1.00000000 sec  
 D12 0.00002000 sec  
 HDUTY 20.2 %  
 TDC 1  
 SFO1 400.3315748 MHz  
 NUC1 <sup>1</sup>H  
 F1 10.00 usec  
 PLW1 10.77299975 W  
 SFO2 400.3306380 MHz  
 NUC2 <sup>1</sup>H  
 PLW2 10.77299975 W  
 PLW24 0.00068949 W

F2 - Processing parameters  
 SI 65536  
 SF 400.3300103 MHz  
 WDW EM  
 SSB 0  
 LB 0.30 Hz  
 GB 0  
 PC 1.00

Figure S16. <sup>1</sup>H Homonuclear decoupled NMR of Entry 10

<sup>1</sup>H in CDCl<sub>3</sub>  
 AF 042 - B (10)  
 Q2 = 638 Hz  
 sonde TBI temp 300K

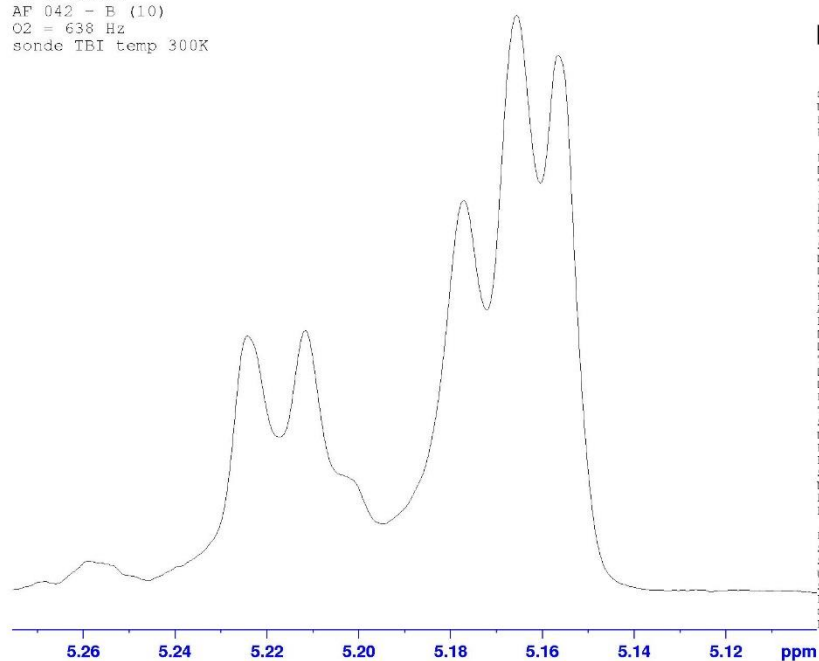

Current Data Parameters  
 NAME MS-GM-20222601  
 EXPNO 119  
 PROCNO 1

F2 - Acquisition Parameters  
 Date\_ 20220126  
 Time 11.19 h  
 INSTRUM AvanceNeo  
 PROBHD Z8277\_0032 (PE  
 PULPROG zgpg30  
 TD 65536  
 SOLVENT CDCl<sub>3</sub>  
 NS 8  
 DS 2  
 SWH 3703.704 Hz  
 FIDRES 0.113028 Hz  
 AQ 0.8473597 sec  
 RG 101  
 DW 135.000 usec  
 DE 10.51 usec  
 TE 300.2 K  
 D1 1.00000000 sec  
 D12 0.00002000 sec  
 HODDUTY 20.2 %  
 TDC 1  
 SFO1 400.3315748 MHz  
 NUC1 1H  
 P1 10.00 usec  
 PLW1 10.7729976 W  
 SFO2 400.3306300 MHz  
 NUC2 1H  
 PLW2 10.7729976 W  
 PLW24 0.00068949 W

F2 - Processing parameters  
 SI 65536  
 SF 400.3300103 MHz  
 WDW EM  
 SSB 0  
 LB 0.30 Hz  
 GB 0  
 PC 1.00

Figure S17. <sup>1</sup>H Homonuclear decoupled NMR of Entry 11
